# Supplementary material for: Oxidized LDL upregulates macrophage DPP4 expression via TLR4/TRIF/CD36 pathways
Source: PubMed Central journal article supplement — eBioMedicine. 2019 Feb 7;41:50–61. doi: 10.1016/j.ebiom.2019.01.065 (PMC6441950; doi:10.1016/j.ebiom.2019.01.065), 2019-02-07
Supplement: mmc1.pdf [file mmc1.pdf]

## Supplemental figures

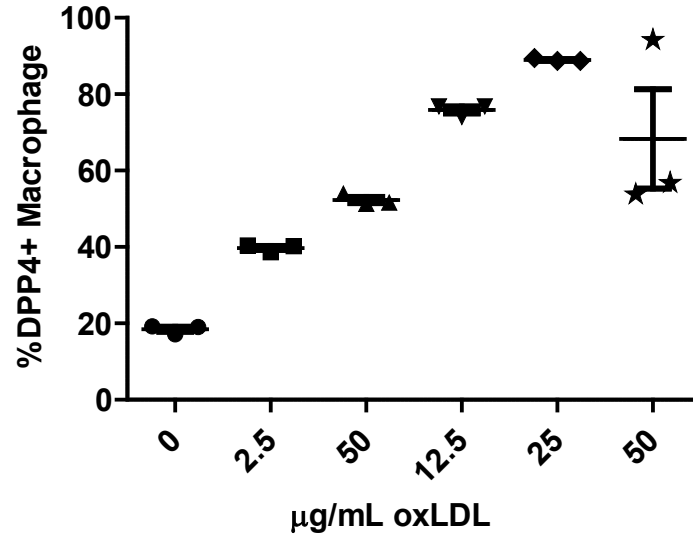

**Supplemental Figure 1** oxLDL dose-dependently increases DPP4 expression on macrophages: Bone marrow cells isolated from C57BL/6 mice were cultured in the presence of 10 ng/mL M-CSF for 5 days and treated with indicated doses of oxLDL for 24 hours and detected for DPP4 expression using flow cytometry.

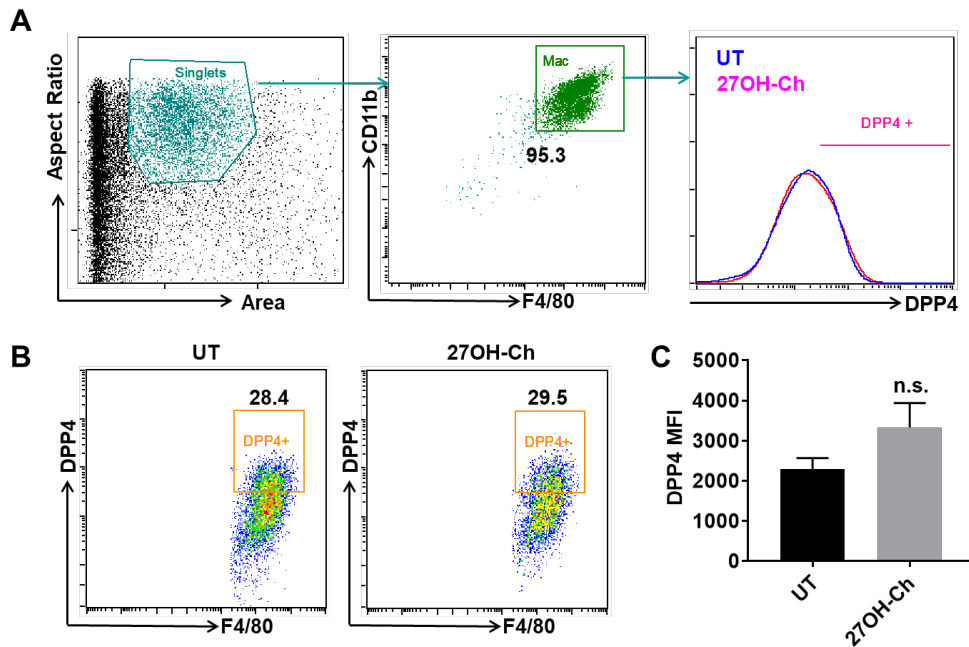

**Supplemental Figure 2 27-hydroxycholesterol does not increase DPP4 expression on macrophages:** Bone marrow-derived macrophages from C57BL/6 mice were treated with 2  $\mu$ M 27-hydroxycholesterol (27OH-Ch) for 24 hours and detected for DPP4 expression using flow cytometry. **A**, Gating strategy and histogram. **B**, representative dot plots showing the expression of DPP4. **C**, Statistical analysis showing the DPP4 mean fluorescence intensity. n.s., not statistically significant.

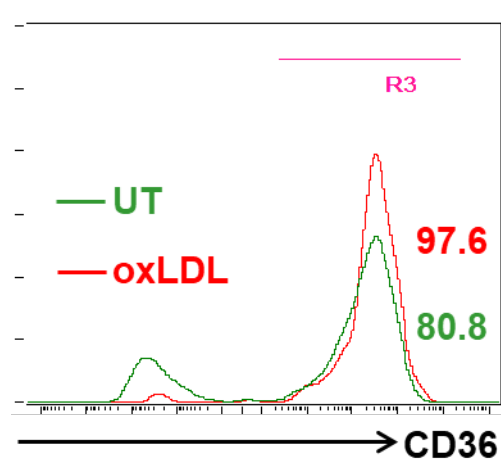

**Supplemental Figure 3 oxLDL increases CD36 expression:** WT BMMs were treated with 25  $\mu$ g/mL oxLDL and CD36 expression was examined using flow cytometry after 24 hours of treatment.
